# Supplementary material for: Effects of Histamine Receptor Antagonist Cetirizine on Orthodontic Tooth Movement
Source: PubMed Central journal article supplement (PMC7762581; doi:10.3390/biomedicines8120583), 2020-12-08
Supplement: biomedicines-08-00583-s001.pdf [file biomedicines-08-00583-s001.pdf]

## Supplementary information

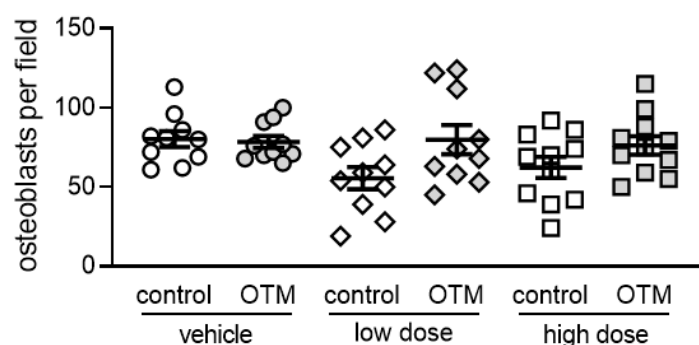

**Figure S1:** Osteoblast number at the surface of the alveolar bone in tension areas of the periodontal ligament in a standardized ROI of  $15\mu\text{m} \times 160\mu\text{m}$ .

To determine osteoblast numbers on the alveolar bone at the tension side (Fig. S1), sections were stained with safranin-orange. To this aim, we incubated the slides 8 minutes in safranin solution (03982, Fluka, Charlotte, NC, USA), rinsed them in  $\text{H}_2\text{O}_a$  for 1 minute, followed by 10 minutes in picric acid (P6744, Sigma-Aldrich, St. Louis, MO, USA). After rinsing in  $\text{H}_2\text{O}_a$  for 20 sec, slides were incubated in a 0.1% light-green solution (115941, Sigma-Aldrich, St. Louis, MO, USA) with 0.1% acetic acid (3738.1 Carl Roth GmbH, Karlsruhe, Germany). After dehydration by an ascending series of alcohol, coverslips were applied with entellan and stained sections were digitized under the microscope (Olympus IX50 microscope in combination with a DP2-SAL camera, Olympus, Hamburg, Germany). Numbers of osteoblasts were counted at the surface of the alveolar bone in tension areas of the periodontal ligament in a standardized ROI of  $15\mu\text{m} \times 160\mu\text{m}$  in every slide.

**Table S1:** Statistical analysis of body weight change during the experiment ( $F_w = 0.9213$ .  $df = 67.88$ .  $p = 0.4029$ ) using Games-Howell's multiple comparisons tests.

| comparision               | 95% CI of diff  | p-value |
|---------------------------|-----------------|---------|
| control vs. normal dose   | -17.77 to 12.26 | 0.8993  |
| control vs. high dose     | -8.828 to 20.27 | 0.6157  |
| normal dose vs. high dose | -6.861 to 23.81 | 0.3869  |

**Table S2:** Statistical analysis of TRAP<sup>+</sup> (osteoclast-like) cells ( $F_w = 1.638$ .  $df = 28.27$ ;  $p = 0.1824$ ) using Games-Howell's multiple comparisons tests.

| comparision                           | 95% CI of diff   | p-value |
|---------------------------------------|------------------|---------|
| vehicle: control vs. OTM              | -4.334 to 1.074  | 0.3803  |
| low dose control vs. OTM              | -2.615 to 0.8980 | 0.6438  |
| high dose control vs. OTM             | -2.471 to 2.049  | 0.9996  |
| vehicle control vs. low dose control  | -1.424 to 1.280  | >0.9999 |
| vehicle control vs. high dose control | -1.907 to 0.6495 | 0.6354  |
| low control vs. high dose control     | -2.094 to 0.9806 | 0.8615  |
| vehicle OTM vs. low dose OTM          | -2.144 to 3.543  | 0.9642  |
| vehicle OTM vs. high dose OTM         | -2.322 to 3.904  | 0.9642  |
| low dose OTM vs. high dose OTM        | -2.289 to 2.471  | >0.9999 |

**Table S3:** Statistical analysis of osteoblast number ( $F = 2.619$ ,  $df = 56$ ;  $p = 0.0338$ ) using Bonferroni's multiple comparisons tests.

| comparision                           | 95% CI of diff  | p-value |
|---------------------------------------|-----------------|---------|
| vehicle: control vs. OTM              | -25.02 to 28.62 | >0.9999 |
| low dose control vs. OTM              | -51.22 to 2.423 | 0.1006  |
| high dose control vs. OTM             | -39.48 to 11.67 | >0.9999 |
| vehicle control vs. low dose control  | -2.123 to 51.52 | 0.0925  |
| vehicle control vs. high dose control | -8.279 to 44.13 | 0.4808  |
| low control vs. high dose control     | -32.98 to 19.43 | >0.9999 |
| vehicle OTM vs. low dose OTM          | -28.32 to 25.32 | >0.9999 |
| vehicle OTM vs. high dose OTM         | -23.99 to 28.42 | >0.9999 |
| low dose OTM vs. high dose OTM        | -22.49 to 29.92 | >0.9999 |

**Table S4:** Statistical analysis of root resorptions ( $F_w = 6.826$ ,  $df = 25.88$ ;  $p = 0.0004$ ) using Games-Howell's multiple comparisons tests.

| comparision                           | 95% CI of diff     | p-value |
|---------------------------------------|--------------------|---------|
| vehicle: control vs. OTM              | -2.034 to -0.1801  | 0.0178  |
| low dose control vs. OTM              | -3.076 to 0.6449   | 0.2918  |
| high dose control vs. OTM             | -3.205 to 0.03272  | 0.0556  |
| vehicle control vs. low dose control  | -0.3495 to 0.1193  | 0.5974  |
| vehicle control vs. high dose control | -0.09888 to 0.1051 | >0.9999 |
| low control vs. high dose control     | -0.1123 to 0.3487  | 0.5377  |
| vehicle OTM vs. low dose OTM          | -2.170 to 1.723    | 0.9988  |
| vehicle OTM vs. high dose OTM         | -2.208 to 1.255    | 0.9442  |
| low dose OTM vs. high dose OTM        | -2.487 to 1.981    | 0.9991  |

**Table S5:** Statistical analysis of cranial growth ( $F_w = 2.859$ ,  $df = 50.04$ ;  $p = 0.0240$ ) using Games-Howell's multiple comparisons tests.

| comparision                           | 95% CI of diff     | p-value |
|---------------------------------------|--------------------|---------|
| vehicle: control vs. OTM              | -0.3064 to 0.3424  | >0.9999 |
| low dose control vs. OTM              | -0.3883 to 0.5609  | 0.9936  |
| high dose control vs. OTM             | -0.1513 to 0.7955  | 0.3368  |
| vehicle control vs. low dose control  | -0.7507 to 0.1830  | 0.4573  |
| vehicle control vs. high dose control | -0.8316 to 0.06289 | 0.1267  |
| low control vs. high dose control     | -0.6126 to 0.4115  | 0.9910  |
| vehicle OTM vs. low dose OTM          | -0.5532 to 0.1221  | 0.3953  |
| vehicle OTM vs. high dose OTM         | -0.4446 to 0.2841  | 0.9833  |
| low dose OTM vs. high dose OTM        | -0.2957 to 0.5662  | 0.9319  |

**Table S6:** Statistical analysis of root torque ( $F_w = 15.15$ .  $df = 50.93$ ;  $p < 0.0001$ ) using Games-Howell's multiple comparisons tests.

| comparision                           | 95% CI of diff     | p-value |
|---------------------------------------|--------------------|---------|
| vehicle: control vs. OTM              | -0.7163 to 0.01925 | 0.0720  |
| low dose control vs. OTM              | -0.7304 to -0.1812 | 0.0003  |
| high dose control vs. OTM             | -1.036 to -0.3892  | <0.0001 |
| vehicle control vs. low dose control  | -0.1600 to 0.5502  | 0.5707  |
| vehicle control vs. high dose control | -0.01614 to 0.7211 | 0.0678  |
| low control vs. high dose control     | -0.1812 to 0.4960  | 0.7274  |
| vehicle OTM vs. low dose OTM          | -0.2043 to 0.3799  | 0.9402  |
| vehicle OTM vs. high dose OTM         | -0.3339 to 0.3106  | >0.9999 |
| low dose OTM vs. high dose OTM        | -0.3531 to 0.1542  | 0.8401  |

**Table S7:** Statistical analysis of mesialisation ( $F = 33.79$ .  $df = 110$ ;  $p < 0.0001$ ) using Bonferroni's multiple comparisons tests.

| comparision                           | 95% CI of diff     | p-value |
|---------------------------------------|--------------------|---------|
| vehicle: control vs. OTM              | -0.9092 to -0.2768 | <0.0001 |
| low dose control vs. OTM              | -1.177 to -0.5282  | <0.0001 |
| high dose control vs. OTM             | -1.383 to -0.7340  | <0.0001 |
| vehicle control vs. low dose control  | -0.1924 to 0.4483  | >0.9999 |
| vehicle control vs. high dose control | -0.04344 to 0.5973 | 0.1446  |
| low control vs. high dose control     | -0.1755 to 0.4734  | >0.9999 |
| vehicle OTM vs. low dose OTM          | -0.4520 to 0.1887  | >0.9999 |
| vehicle OTM vs. high dose OTM         | -0.5089 to 0.1319  | 0.8899  |
| low dose OTM vs. high dose OTM        | -0.3813 to 0.2676  | >0.9999 |

**Table S8:** Statistical analysis of periodontal bone loss ( $F = 28.89$ .  $df = 61$ ;  $p < 0.0001$ ) using Bonferroni's multiple comparisons tests.

| comparision                           | 95% CI of diff     | p-value |
|---------------------------------------|--------------------|---------|
| vehicle: control vs. OTM              | -0.4096 to -0.1437 | <0.0001 |
| low dose control vs. OTM              | -0.4207 to -0.1611 | <0.0001 |
| high dose control vs. OTM             | -0.4567 to -0.2083 | <0.0001 |
| vehicle control vs. low dose control  | -0.2214 to 0.04451 | 0.5445  |
| vehicle control vs. high dose control | -0.1391 to 0.1215  | >0.9999 |
| low control vs. high dose control     | -0.04741 to 0.2067 | 0.6883  |
| vehicle OTM vs. low dose OTM          | -0.2325 to 0.02704 | 0.2373  |
| vehicle OTM vs. high dose OTM         | -0.1917 to 0.06233 | >0.9999 |
| low dose OTM vs. high dose OTM        | -0.08900 to 0.1651 | >0.9999 |

**Table S9:** Statistical analysis of inclination ( $F_w = 13.99$ .  $df = 28.19$ ;  $p < 0.0001$ ) using Games-Howell's multiple comparisons tests.

| comparsion                            | 95% CI of diff  | p-value |
|---------------------------------------|-----------------|---------|
| vehicle: control vs. OTM              | 3.072 to 9.861  | 0.0001  |
| low dose control vs. OTM              | 2.701 to 16.54  | 0.0050  |
| high dose control vs. OTM             | -1.053 to 13.09 | 0.1190  |
| vehicle control vs. low dose control  | -4.651 to 2.353 | 0.8996  |
| vehicle control vs. high dose control | -3.149 to 4.132 | 0.9980  |
| low control vs. high dose control     | -2.064 to 5.344 | 0.7350  |
| vehicle OTM vs. low dose OTM          | -4.885 to 8.899 | 0.9208  |
| vehicle OTM vs. high dose OTM         | -6.951 to 7.036 | >0.9999 |
| low dose OTM vs. high dose OTM        | -10.66 to 6.733 | 0.9790  |

**Table S10:** Statistical analysis of distance between M1/M2 ( $F_w = 28.03$ .  $df = 28.12$ ;  $p < 0.0001$ ) using Games-Howell's multiple comparisons tests.

| comparsion                            | 95% CI of diff        | p-value |
|---------------------------------------|-----------------------|---------|
| vehicle: control vs. OTM              | -0.3158 to -0.1479    | <0.0001 |
| low dose control vs. OTM              | -0.8214 to -0.1477    | 0.0050  |
| high dose control vs. OTM             | -0.6439 to -0.03277   | 0.0276  |
| vehicle control vs. low dose control  | -2.438e-005 to 0.1128 | 0.0501  |
| vehicle control vs. high dose control | -0.03514 to 0.07074   | 0.8945  |
| low control vs. high dose control     | -0.09549 to 0.01836   | 0.3142  |
| vehicle OTM vs. low dose OTM          | -0.5349 to 0.1422     | 0.4116  |
| vehicle OTM vs. high dose OTM         | -0.3968 to 0.2194     | 0.9219  |
| low dose OTM vs. high dose OTM        | -0.3051 to 0.5204     | 0.9610  |
